# Supplementary figures and images for: Locomotor Exercise Enhances Supraspinal Control of Lower-Urinary-Tract Activity to Improve Micturition Function after Contusive Spinal-Cord Injury
Source: MDPI journal article supplement (doi:10.3390/cells11091398), 2022-04-20

Supplementary material:

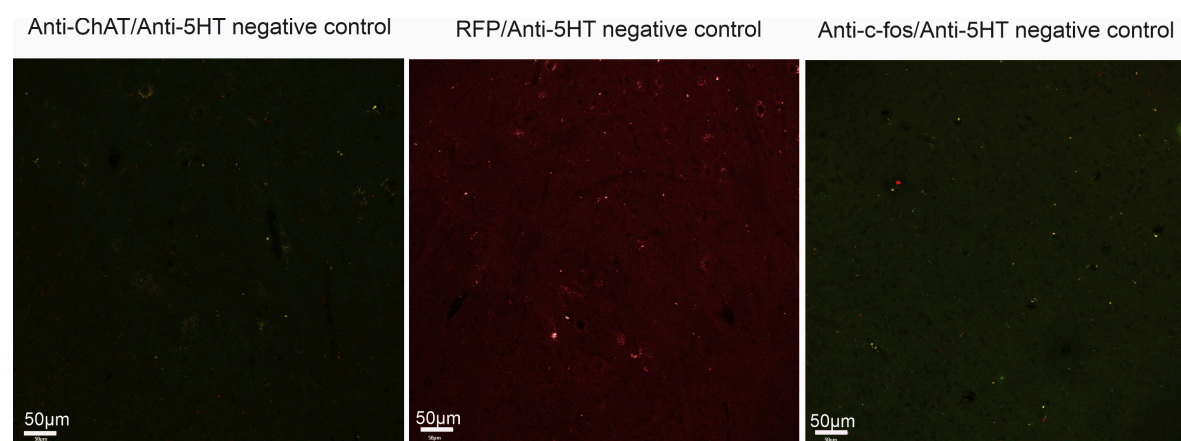

**Figure S1.** negative control from primary antibody .

Supplement: s1 [file s1]
